# Supplementary material for: Circulatory Neutrophils Exhibit Enhanced Neutrophil Extracellular Trap Formation in Early Puerperium: NETs at the Nexus of Thrombosis and Immunity
Source: MDPI journal article supplement (doi:10.3390/ijms222413646), 2021-12-20
Supplement: s1 [file s1]

**Figure S1.** Cell free nucleosomes and differential cell counts postpartum. **(a.)** In contrast to the serum levels, the plasma levels of cell free nucleosomes attained statistical significance. **(b.)** Polymorphonuclear neutrophil and mononuclear cell counts in peripheral blood from healthy donors, donors during pregnancy and 48 hours postpartum as determined by sandwich ELISA. P: pregnancy; PD: post-delivery. Data are presented as mean  $\pm$  SEM. \*P < 0.05, \*\*P < 0.01, \*\*\*P < 0.001, \*\*\*\*P < 0.0001.

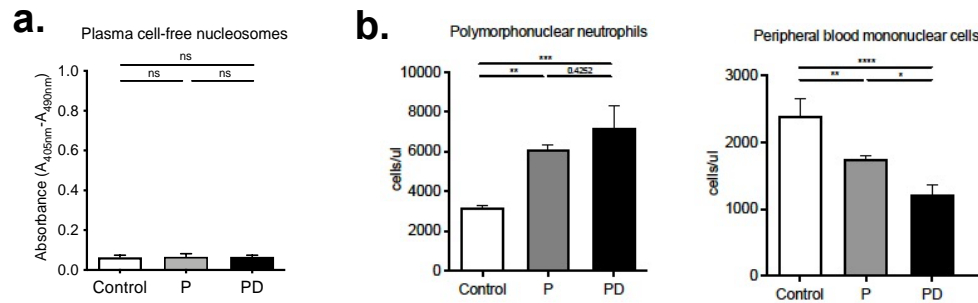

**Figure S2.** Oxidative burst and phagocytic activity evaluation of postpartum neutrophils. **(a.)** Intracellular oxidative burst in neutrophils from healthy control donors, donors during pregnancy and postpartum by DCFH-DA detection. **(b.)** Extracellular oxidative burst in neutrophils from healthy control donors, donors during pregnancy and postpartum by luminol assay. **(c.)** Phagocytic activity of neutrophils obtained from healthy female controls, donors during pregnancy and 48 hours post-delivery. P: pregnancy; PD: post-delivery; ecROS: extracellular ROS; icROS: intracellular ROS; RFU: relative fluorescence units; MLU: mean fluorescence units; AUC: area under the curve. Data are presented as mean  $\pm$  SEM. \* $P < 0.05$ , \*\* $P < 0.01$ , \*\*\* $P < 0.001$ , \*\*\*\* $P < 0.0001$ . (one- or two-way ANOVA followed by Bonferroni's multiple comparison post-test). All experiments were performed at least 3 times with consistent results.

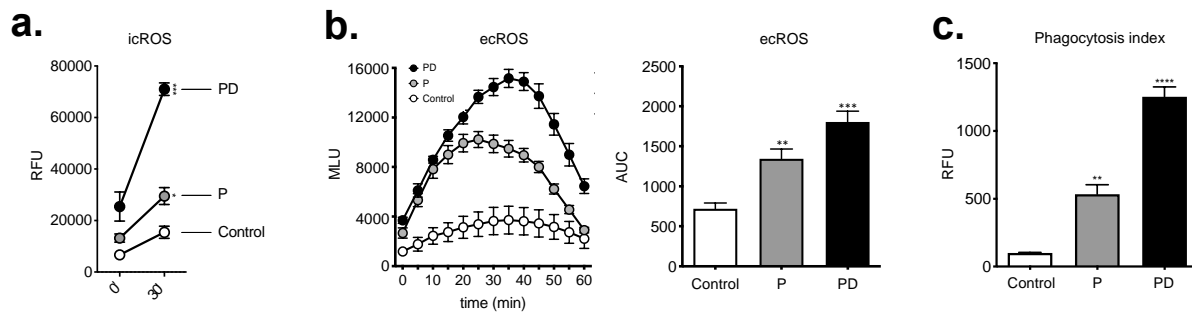

**Figure S3.** Serum and plasma concentrations of G-CSF in healthy non-pregnant controls, pregnant individuals and at post-delivery (**a.**). P: pregnancy; PD: post-delivery. Data are presented as mean  $\pm$  SEM. \*\*P < 0.01, \*\*\*\*P < 0.0001.

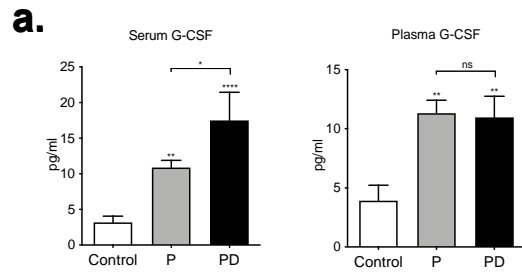

**Figure S4.** Quantitative and qualitative assessments of the utilized microparticles. **(a.)** Fluorescence histograms and bar graph depicting the quantitative analysis of microparticles in control, pregnancy and 48 hours postpartum plasma, positive for AnnexinV staining. Plasma was assessed for 60 seconds. P: pregnancy; PD: post-delivery. Data are presented as mean  $\pm$  SEM. \* $P < 0.05$ , \*\*\* $P < 0.001$ . **(b.)** Size, size distribution, concentration and volume determination of microparticles in control, pregnancy and 48 hours postpartum plasma.

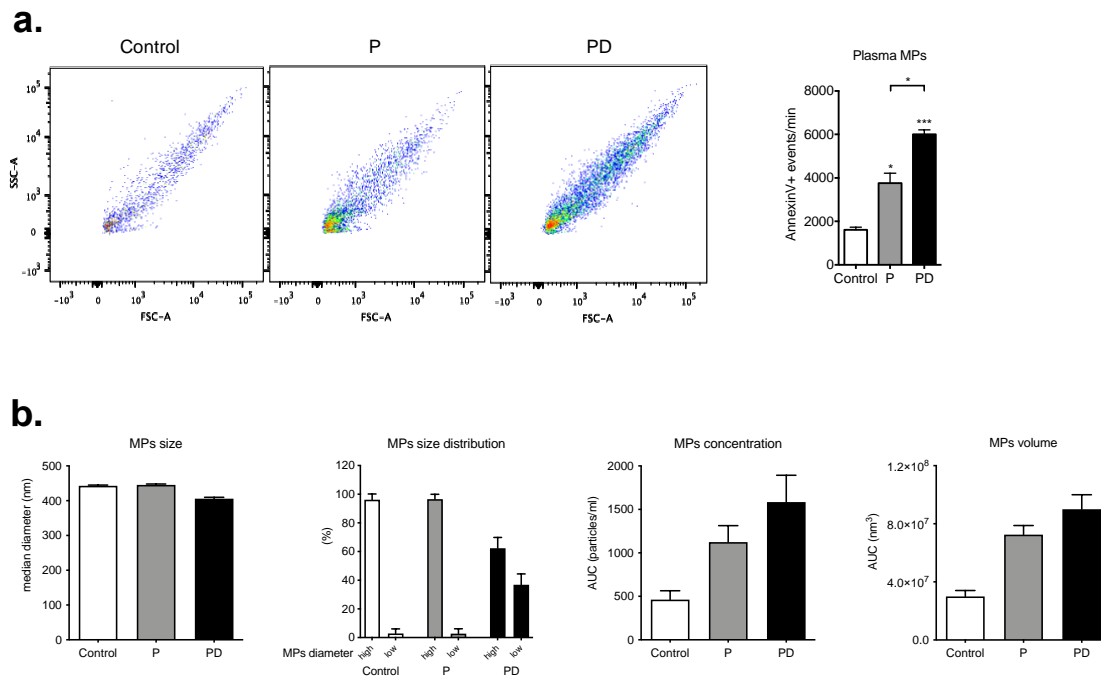

**Table S1.** Demographic characteristics of the study cohort, i.e. non-pregnant healthy controls, women during the three trimesters of pregnancy and women at postpartum.

|                         | Non-pregnant | Pregnant         | Postpartum | P  |
|-------------------------|--------------|------------------|------------|----|
| n                       | 20           | 29               | 9          | na |
|                         |              | IT: 5            |            |    |
|                         |              | IIT: 13          |            |    |
|                         |              | IIIT: 11         |            |    |
| Maternal age (years)    | 32 (23-46)   | 36 (26-41)       | 38 (25-40) | ns |
| Gestational age (weeks) | na           | IT: 12 (12-13)   | na         | na |
|                         |              | IIT: 24 (22-26)  |            |    |
|                         |              | IIIT: 38 (37-41) |            |    |

Values expressed as mean  $\pm$  SEM with minimum-maximum, where applicable; IT, first trimester; IIT, second trimester, IIIT, third trimester ns, not significant; na, not applicable.
